# Supplementary material for: Enabling highly efficient photocatalytic hydrogen generation and organics degradation via a perovskite solar cell-assisted semiconducting nanocomposite photoanode
Source: Royal Society of Chemistry journal article supplement (doi:10.1039/c8ta08998a), 2018-11-06
Supplement: c8ta08998a1.pdf [file c8ta08998a1.pdf]

# **Enabling Highly Efficient Photocatalytic Hydrogen Generation and Organics Degradation via a Perovskite Solar Cell-Assisted Semiconducting Nanocomposite Photoanode**

Xueqin Liu,<sup>‡ab</sup> Yang Wang,<sup>‡a</sup> Xun Cui,<sup>bc</sup> Meng Zhang,<sup>b</sup> Bing Wang,<sup>b</sup> Matthew Rager,<sup>b</sup> Zhu Shu,<sup>a</sup> Yingkui Yang,<sup>\*c</sup> Zhen Li<sup>\*a</sup> and Zhiqun Lin<sup>\*b</sup>

[\*]X.Q. Liu, Y. Wang, Z. Shu, Prof. Z. Li  
Engineering Research Center of Nano-Geo Materials of Ministry of Education,  
Faculty of Materials Science and Chemistry,  
China University of Geosciences  
Wuhan, Hubei 430074 (China)  
E-mail: liuxq@cug.edu.cn; zhenli@cug.edu.cn

X.Q. Liu, X. Cui, M. Zhang, B. Wang, M. Rager, Prof. Z.Q. Lin  
School of Materials Science and Engineering,  
Georgia Institute of Technology  
Atlanta, GA 30332 (USA)  
E-mail: zhiqun.lin@mse.gatech.edu

X. Cui, Prof. Y.K. Yang  
Key Laboratory of Catalysis and Materials Science of State Ethnic Affairs  
Commission & Ministry of Education, School of Chemistry and Materials Science,  
South-Central University for Nationalities, Wuhan, 430074, China.  
E-mail: ykyang@mail.scuec.edu.cn

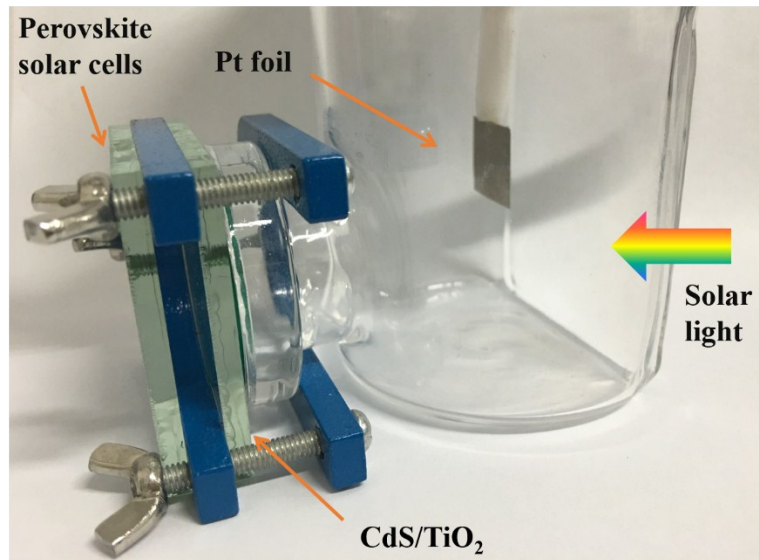

**Fig. S1** Photograph of the integrated device composed of PSC and CdS/TiO<sub>2</sub> NRAs nanocomposite.

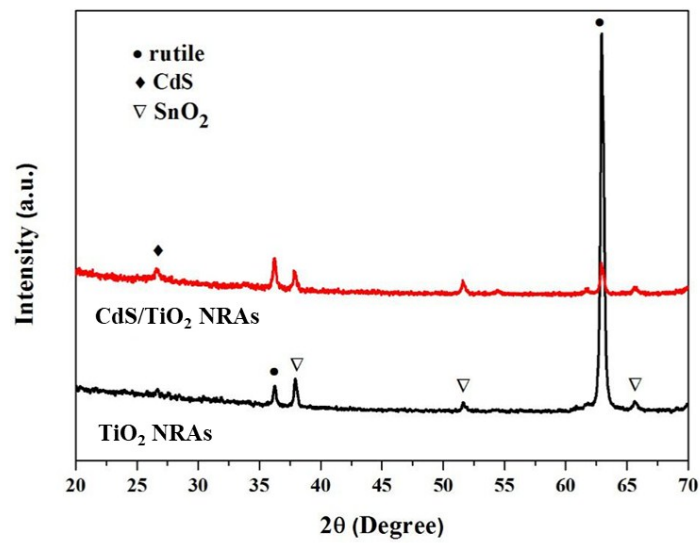

**Fig. S2** The XRD spectra of TiO<sub>2</sub> NRAs and CdS/TiO<sub>2</sub> NRAs.

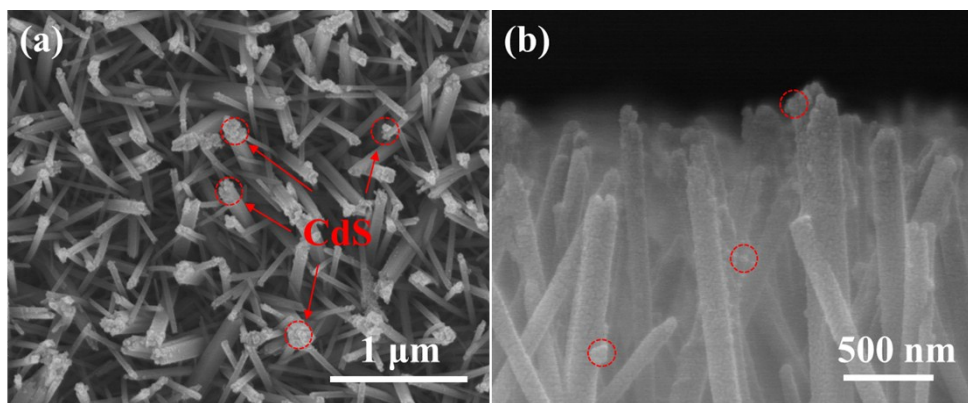

**Fig. S3** The SEM images of CdS/TiO<sub>2</sub> NRAs.

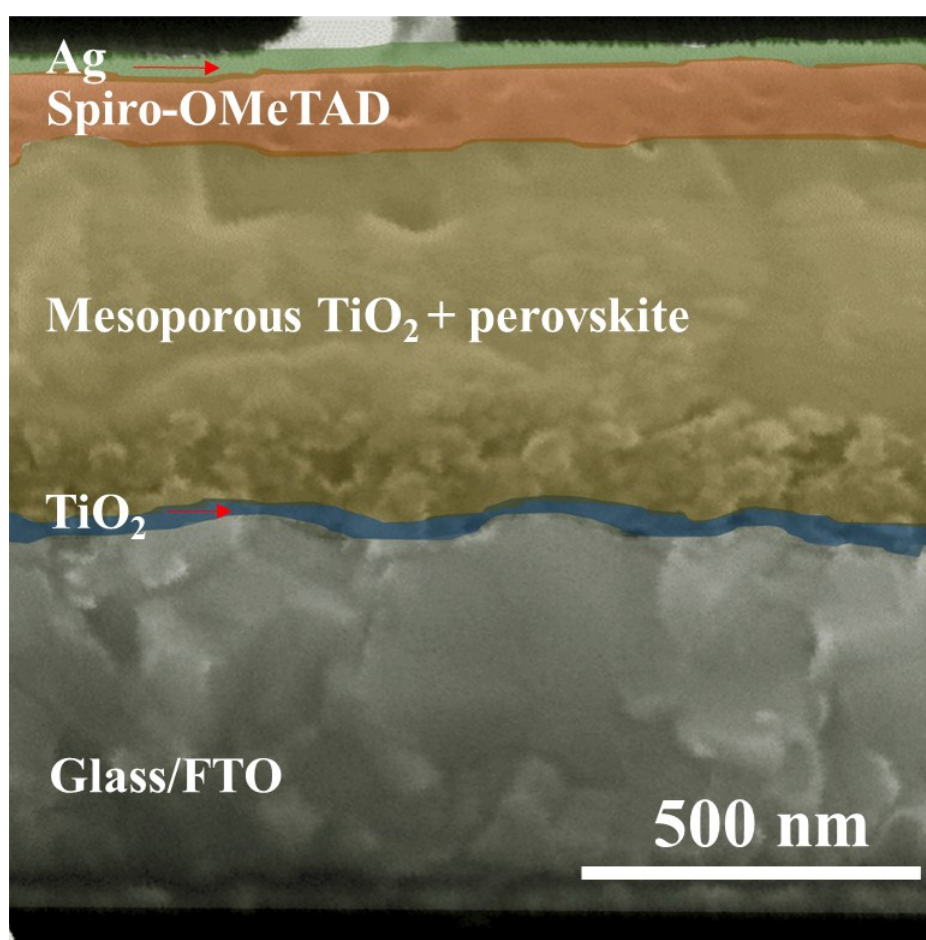

**Fig. S4** The cross sectional SEM image of PSC.

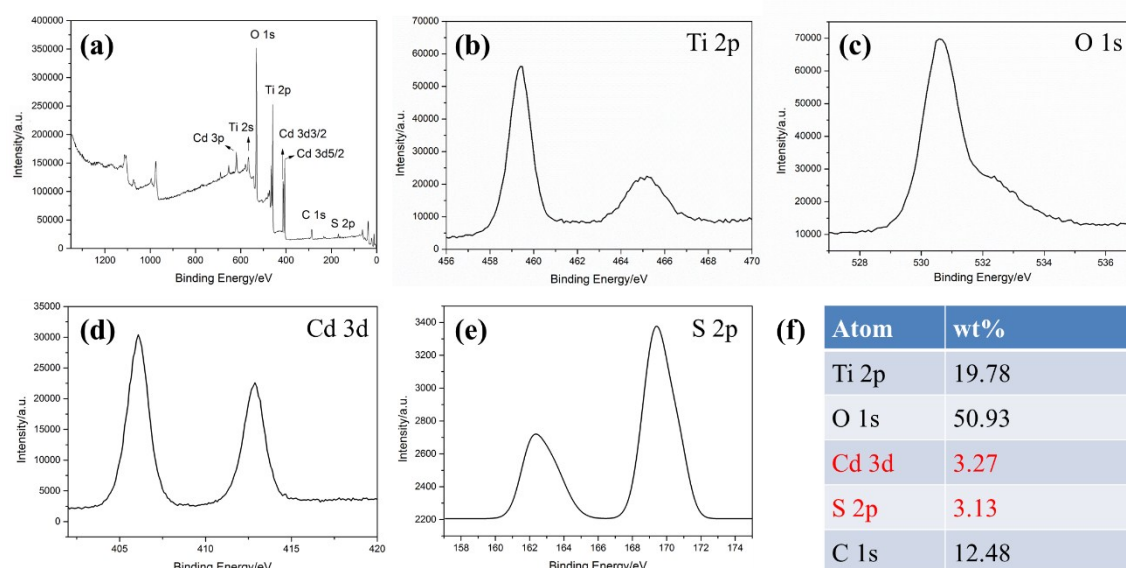

**Fig. S5** XPS spectra of CdS/TiO<sub>2</sub> NTAs. (a) Full spectrum, (b) Ti 2p spectrum, (c) O 1s spectrum, (d) Cd 3d spectrum, and (e) S 2p spectrum. (f) Weight fraction of all elements in CdS/TiO<sub>2</sub> NRAs.

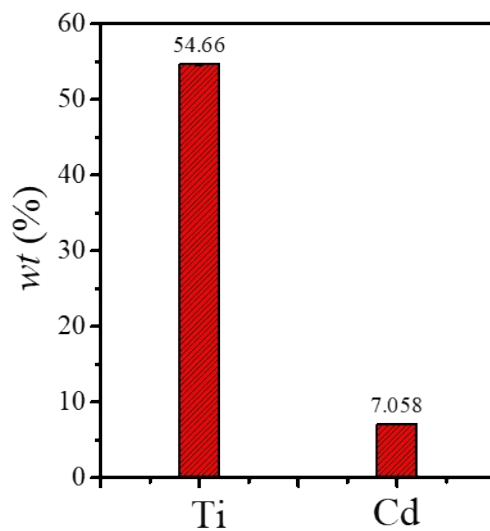

**Fig. S6** ICP-OES analyses of CdS/TiO<sub>2</sub> RNAs composite.

As shown in **Fig. S6**, according to the amount-of-substance of Cd and Ti, the amount of CdS on CdS/TiO<sub>2</sub> NRAs can be obtained (8.39 wt% or 4.80 at%).

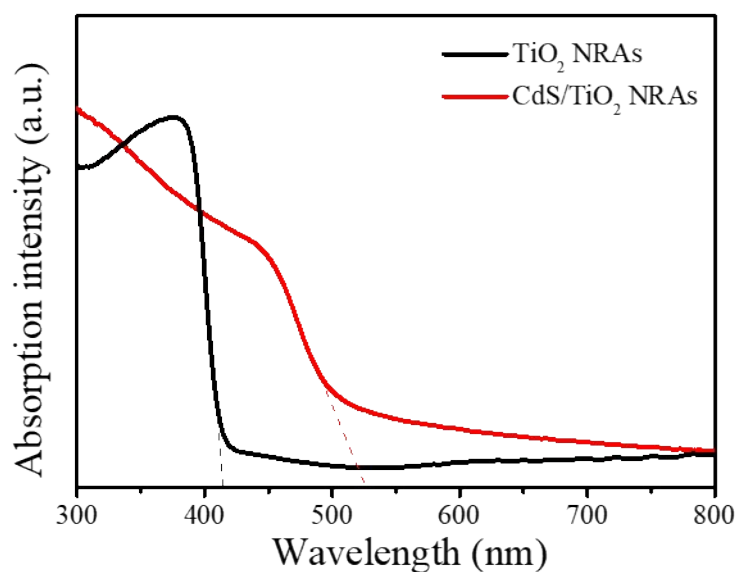

**Fig. S7** UV-vis diffuse reflectance spectra of CdS/TiO<sub>2</sub> NTAs and pure TiO<sub>2</sub> NRAs.

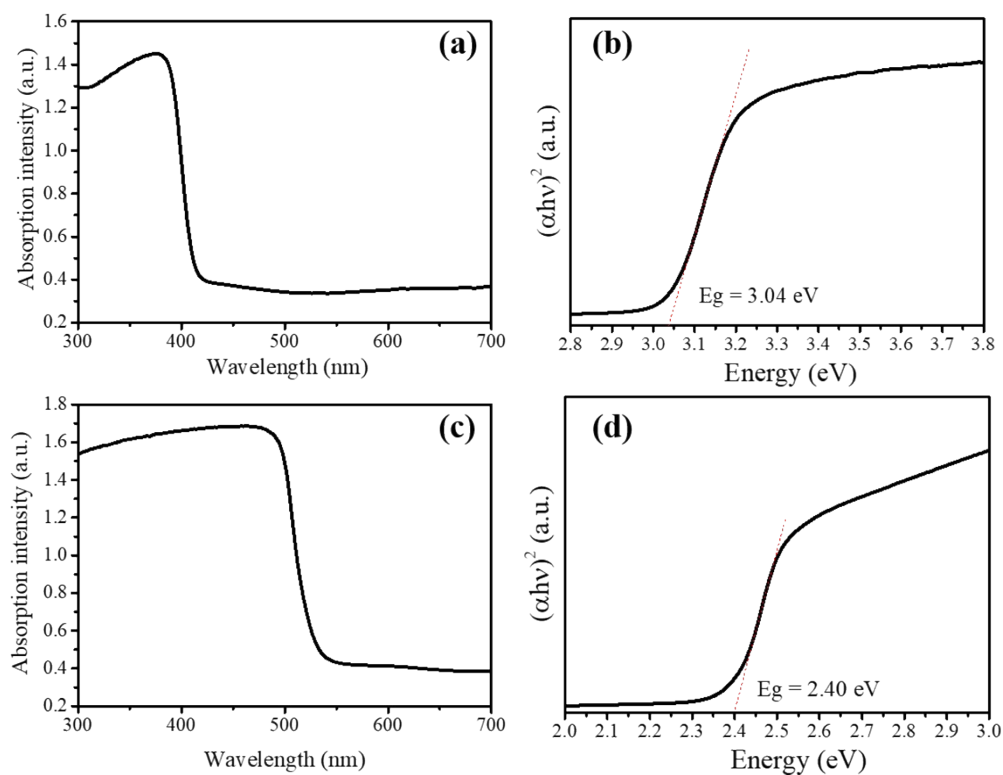

**Fig. S8** (a and c) UV-Vis diffuse reflectance spectra and (b and d) plots of  $(\alpha h\nu)^2$  vs. photon energy for (a) TiO<sub>2</sub> NRAs and (c) CdS film, respectively.

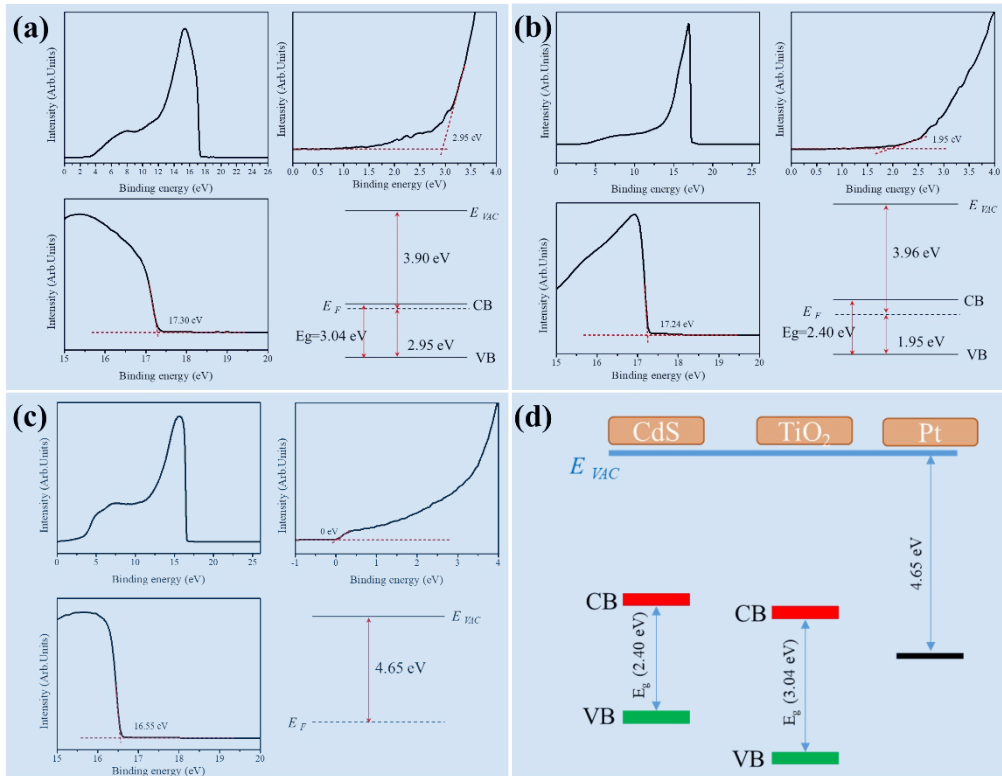

**Fig. S9** Ultraviolet photoelectron spectra (UPS) and energy levels of (a) TiO<sub>2</sub> NRAs, (b) CdS, and (c) Pt/FTO films. (d) Energy band diagrams of CdS, TiO<sub>2</sub> NRAs, and Pt/FTO films.

The energy band diagrams of CdS, TiO<sub>2</sub> NRAs, and Pt/FTO films based on normal hydrogen electrode (NHE) can be obtained by the following equation:

$$E_{NHE} = -4.5 - E_{VAC}$$

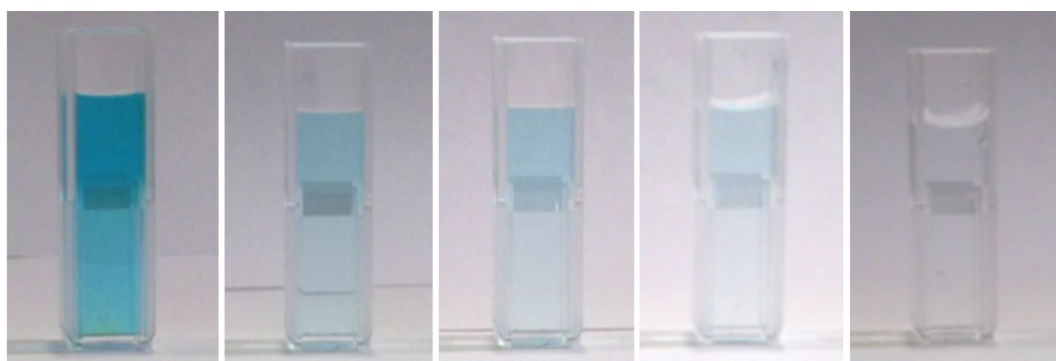

**0 min**

**10 min**

**20min**

**30 min**

**40 min**

**Fig. S10** Photographs of color-change of MB solution during photoelectrocatalysis.

**Tab. S1** Summary on solar-to-hydrogen efficiency and degradation rate of the related integrated devices or materials in literatures.

| Samples                                                        | STH(%)               | Degradation rate                                             | REF .     |
|----------------------------------------------------------------|----------------------|--------------------------------------------------------------|-----------|
| Cu <sub>2</sub> O-perovskite-IrO <sub>2</sub> tandem cell      | 2.5                  | --                                                           | [1]       |
| Bismuth vanadate–cuprous oxide tandem cell                     | 0.5                  | --                                                           | [2]       |
| Oxide photoanode and a dye-sensitized solar cell               | 3.1                  | --                                                           | [3]       |
| p-type Cu-Ti-O film combined with n-type TiO <sub>2</sub> film | 0.3                  | --                                                           | [4]       |
| Perovskite–hematite tandem cell                                | 2.4                  | --                                                           | [5]       |
| Lead halide perovskite–BiVO <sub>4</sub> tandem cell           | 2.5                  | --                                                           | [6]       |
| ZnTe-based photocathode and perovskite solar cell in tandem    | 0.43 (solar-to-fuel) | --                                                           | [7]       |
| CdS/TiO <sub>2</sub> NTs/ZnO NRs                               | --                   | 1.08 × 10 <sup>-2</sup> min <sup>-1</sup>                    | [8]       |
| TiO <sub>2</sub> with H <sub>2</sub> O <sub>2</sub>            | --                   | 1.52 × 10 <sup>-2</sup> min <sup>-1</sup><br>(4-cholophenol) | [9]       |
| Perovskite solar cell and CdS/TiO <sub>2</sub> NRAs photoanode | 1.54                 | 9.66 × 10 <sup>-2</sup> min <sup>-1</sup>                    | this work |

## References

- [1] P. Dias, M. Schreier, S.D. Tilley, J. Luo, J. Azevedo, L. Andrade, D. Bi, A. Hagfeldt, A. Mendes, M. Grätzel, M. T. Mayer, *Adv. Energy Mater.*, 2015, **5**, 1501537.
- [2] P. Bornozy, F.F. Abdi, S.D. Tilley, B. Dam, R. van de Krol, M. Graetzel, K. Sivula, *J. Phys. Chem. C*, 2014, **118**, 16959-16966.
- [3] J. Brilliet, J.-H. Yum, M. Cornuz, T. Hisatomi, R. Solarska, J. Augustynski, M. Graetzel, K. Sivula, *Nat. Photonics*, 2012, **6**, 824-828.
- [4] O.K.V. Gopal K. Mor, Rudeger H. T. Wilke, Sanjeev Sharma, Karthik Shankar, Thomas J. Latempa, Kyoung-Shin Choi, Craig A. Grimes, *Nano Lett.*, 2008, **8**, 1906-1911.
- [5] Gurudayal, D. Sabba, M.H. Kumar, L. H. Wong, J. Barber, M. Gratzel, N. Mathews, *Nano Lett.*, 2015, **15**, 3833-3839.
- [6] Y. S. Chen, J. S. Manser, P. V. Kamat, *J. Am. Chem. Soc.*, 137 (2015) 974-981.
- [7] Y. J. Jang, I. Jeong, J. Lee, J. Lee, M. J. Ko, J. S. Lee, *ACS Nano*, 2016, **10**, 6980-6987.
- [8] L. Wu, M. Zhang, J. Li, C. Cen, X. Li, *Res. Chem. Intermediat.*, 2015, **42**, 4569-4580.
- [9] G. Qin, Z. Sun, Q. Wu, L. Lin, M. Liang, S. Xue, *J. Hazard. Mater.*, 2011, **192**, 599-604.
